# Supplementary material for: A Multi-Factorial Observational Study on Sequential Fecal Microbiota Transplant in Patients with Medically Refractory Clostridioides difficile Infection
Source: MDPI journal article supplement (doi:10.3390/cells10113234), 2021-11-19
Supplement: s1 [file s1]

## **Supplementary Materials**

### **Supplementary Methods**

#### **DNA extraction for 16S rRNA gene sequencing:**

DNA was extracted from faecal samples (~250 mg of stool) via the DNeasy PowerSoil Kit (Qiagen, UK) using manufacturer's instructions, but with the addition of a bead-beating step at speed 8 for 3 min via use of a Bullet Blender Storm (Chemobio Ltd, UK)(Mullish et al., 2018). Extracted DNA was quantified using a Qubit 2.0 Fluorometer (ThermoFischer Scientific, UK), and stored at -80°C pending downstream assays.

#### **Metabolomic analysis:**

##### **Ultra-performance liquid chromatography-mass spectrometry (UPLC-MS) profiling and analysis of fecal bile acids**

The protocols used for faecal extract preparation and data accumulation were as previously described (15, 82). In addition, mass spectrometry data was analyzed using peakPanther, an automated pipeline for the detection, integration and reporting of predefined features across a large number of mass spectrometry data files (<https://github.com/phenomecentre/peakPanther>) (Wolfer et al., 2020).

##### **Gas chromatography-mass spectrometry (GC-MS) for the detection, identification and quantification of short chain fatty acids in feces and serum**

Targeted GC-MS was performed using adaptation of previously described protocols for the analysis of samples of stool (18, 84) and serum (Moreau et al., 2003). Samples analysis was performed on an Agilent 7890B GC system coupled to an Agilent 5977A mass selective detector (Agilent, USA). Analysis of data was performed using MassHunter software (Agilent), with SCFA concentrations also being integrated from a freshly prepared calibration curve for each standard to enable quantification.

**NB: References 82-85 only appear in Supplementary Materials**

#### **Stimulation of PBMCs to induce cytokine production by CD4 T cells**

PBMCs in RPMI medium containing FCS (10%) and supplemented with glutamine-streptomycin-penicillin ( $1 \times 10^6$  /ml) were stimulated with PMA (50ng/mL, Sigma Aldrich) Ionomycin (100ng/mL; Sigma Aldrich) and Brefeldin A (10µg/ml; Sigma Aldrich) for 4 hr at 37°C. Post stimulation, the cells were surface-stained (anti-human CD3, anti-human CD4), fixed with Reagent A (Thermo Fischer Scientific) for 30 min, followed by a wash and permeabilization with permeabilization reagent (Thermo Fischer Scientific), and stained with a combination of antibodies including anti-human IL17 APC, anti-human IFN $\gamma$  PE, anti-human IL4 APC, anti-human IL10 PE, anti-human IL6 PE and anti-human TNF $\alpha$  FITC for 30 min at 4°C. This

step was followed by two washes with PBS. Samples were acquired using a Cyan<sup>™</sup> ADP flow cytometer (Dako).

### **Staining for toxin expressing immune cells**

PBMCs in PBS ( $1 \times 10^6$  cells/mL) were incubated with anti-*C.difficile* Toxin A therapeutic antibody – PE (100µg, Creative Biolabs) or anti-*C.difficile* Toxin B therapeutic antibody – PE (100µg, Creative Biolabs) for 1 hr on a rocker at 4°C. Post washing with PBS, cells were stained with combinations of antibodies for 30 min at 4°C, followed by a wash and 15 min with 1 % formaldehyde solution (Thermo Fischer Scientific). Samples were acquired using a Cyan<sup>™</sup> ADP flow cytometer (Dako).

### **Immunostaining via flow cytometry**

T cell subset distribution: CD3, CD4, PTK7, CCR7, CD45RA (APC)

T cell gut homing potential: CD3, CD4, CD45RA (PEcy5.5), CCR9, Integrin

T cell senescence markers: CD3, CD4, CD8, NKG2D, CD28, CD57

T cell activation: CD3, CD4, CD8, CD69

Regulatory T cells: CD3, CD4, CD25, Foxp3

Follicular helper T cells: CD3, CD4, CXCR5, bcl6

Dendritic cell subset distribution: lineage cocktail, HLADR, CD11c, CD80, CD86

B cell subset distribution: CD19, IgD, CD27, CD138

B cell gut homing potential: CD19, CD27, CCR9, Integrin

Regulatory B cells: CD19 (FITC), CD24, CD38, CCR9

Natural Killer cell subsets: CD3, CD56, CD69, NKG2D

### List of antibodies used in flow cytometry

| Antibody                                 | Supplier         | Clone       |
|------------------------------------------|------------------|-------------|
| <b>Surface markers</b>                   |                  |             |
| anti-human CD3-PEcy7                     | Thermo Fischer   | UCHT1       |
| anti-human CD4 Violet                    | Thermo Fischer   | RPA-T4      |
| anti-human CD8 PE                        | Immunotools      | UCHT4       |
| anti-human CCR7 FITC                     | R and D systems  | 150503      |
| anti-human CD45RA APC                    | Biolegend        | HI-100      |
| Anti-human CD45RA Pcy5.5                 | Biolegend        | H1101       |
| anti-human CCR9 PE                       | R and D systems  | MAB179      |
| anti-human Integrin APC                  | Biolegend        | F1B504      |
| anti-human CD28 APC                      | B D Biosciences  | CD28.2      |
| anti-human CD57 FITC                     | Thermo Fischer   | HCD57       |
| Anti-human CD69 APC                      | Thermo Fischer   | H1.2F3      |
| Anti-human CXCR5 APCcy7                  | Biolegend        | J25204      |
| anti-human PTK7 PE                       | Miltenyi Biotech | 188B        |
| anti-human CD19 PE                       | Thermo Fischer   | HIB19       |
| anti-human CD27 Violet                   | Thermo Fischer   | O323        |
| Anti-human CD138 APC                     | Thermo Fischer   | DL101       |
| anti-human CD56 PE                       | Miltenyi Biotech | AF12 7H3    |
| anti-human IgD-FITC                      | Thermo Fischer   | 1A6-2       |
| anti-human CD24-FITC                     | Thermo Fischer   | eBioSN3     |
| anti-human CD38-PEcy7                    | Thermo Fischer   | HIT2        |
| anti-human lineage cocktail pacific blue | Biolegend        |             |
| anti-human HLADR PEcy7                   | Biolegend        | L243        |
| Anti-human CD11c APC                     | Biolegend        | 3.9         |
| Anti-human CD80 FITC                     | BD Biosciences   | L307.4      |
| Anti-human CD86 PE                       | BD Biosciences   | 2331        |
| <b>Transcription factors</b>             |                  |             |
| Anti-human Foxp3 PE                      | Thermo Fischer   | PCH101      |
| Anti-human bcl6 APC                      | Thermo Fischer   | BCL-UP      |
| <b>Intracellular cytokine antibodies</b> |                  |             |
| Anti-human IL17 APC                      | Thermo Fischer   | eBio640EC17 |
| Anti-human IFN $\gamma$ PE               | Biolegend        | B27         |
| Anti-human IL10 PE                       | Thermo Fischer   | JE53-9D7    |
| Anti-human IL4 APC                       | Biolegend        | 8D48        |
| Anti-human TNF FITC                      | BD Biosciences   | Mab 11      |
| Anti-human IL6 PE                        | Biolegend        | MQ2-13A5    |
| <b>Isotype controls</b>                  |                  |             |
| Mouse IgG1 PE                            | Biolegend        | MPC11       |
| Mouse IgG1 FITC                          | Thermo Fischer   | eBM2a       |
| Mouse IgG2b Violet                       | Biolegend        | MOPC21      |
| Mouse IgG1 APC                           | Biolegend        | MOPC21      |
| Mouse IgG1PEcy7                          | Thermo Fischer   | P3.6.281    |
| Mouse IgG2b PEcy5.5                      | Biolegend        | MPC11       |

## Microarray methods

### Antigens and bacterial lysates

For the control antigens, *candida albicans* cell wall and cytoplasmic antigen preparations were obtained from Jena Bioscience GmbH, Germany. CMV purified antigen (strain AD-169) was obtained from The Native Antigen Company (2BScientific, Oxford, UK) (CMP-HP-50UG). EBV viral capsid antigen GP125 (this antigen was used at 30µg/mL) was obtained from Meridian Life Sciences (Tebu-Bio, Cambs.UK). Tetanus toxoid was obtained from the National Institute for Biological Standards and Controls, UK.

For the test antigens, we used highly purified *C. difficile* antigens including *C. difficile* whole toxins TcdA (toxin A) and TcdB (toxin B); toxinotype 0, strain VPI 10463, ribotype 087, kindly gifted by Dr April Roberts, Public Health England), available surface layer protein extracts (SLP) previously purified from three *C. difficile* strains (ribotypes 001, 002, 027, gifted from Professor Christine Loscher, Dublin City University). Lysates of these ribotypes were prepared from freshly grown overnight broth cultures (BHIS). Briefly, 1.5 mL culture was centrifuged at 14,000 g for 10 min and the supernatant discarded. The pellet was resuspended in 300 µL of BugBuster® HT Protein Extraction Reagent (Novagen) and incubated for 20 min at room temperature. Lysates were frozen until required. On each array, a series of 10-point dilutions of purified human immunoglobulin matching the tested isotype were printed as a calibrator to generate a standard curve.

### Microarray procedure

Ten microliters of each diluted target antigen, control antigen and landing light (corner marker) were added into wells of a 384 well, full skirted PCR plate (Eppendorf twin.tec) and microarrays were printed in a 8x2 arrangement onto aldehyde-activated 75x25mm glass microscope slide surface, using an Apogent Microgrid 610 arraying robot (Apogent, USA) with solid arraying pins at a humidity of 70%, with double spotting of each feature. Arrays were rested overnight at room temperature and processed by adding a 16 well Proplate seal and clamps (Grace Biolabs, Oregon, USA). Arrays were blocked by the addition of 100µL Intercept PBS blocking buffer (Li-Cor Biosciences UK Ltd, Cambridge, UK) and incubation for 1 h at room temperature with shaking. Each well was washed 3 times with 100uL of PBS, 0.05% Tween-20 (PBST), inverting and tapping out all liquid after each wash. One hundred microliters of 1:50 diluted serum in Intercept buffer was added to each well and incubated for 1 h at room temperature. Three wells were used for each serum sample to allow measurement of IgG, IgA and IgM responses. Each well was washed 3 times with 100µL of PBS, 0.05% Tween-20 (PBST), inverting and tapping out all liquid after each wash. One hundred microliters of appropriate biotinylated secondary antibody solutions were diluted in Intercept blocking buffer as stated (anti-human IgG (1:20,000), anti-Human IgA (1:10,000) and anti-human IgM (1:10,000), all from Thermofisher Scientific, UK. The diluted biotinylated antibodies were applied to separate wells for each antibody

class examined and incubated for 1 h. After 3 more washes in PBST as before, each well was amplified by incubation with 100µL of a streptavidin-IR800 dye conjugate, diluted 1:20,000 in PBST+0.01% SDS (Li-Cor BioSciences UK) for 30 min. The wells were washed 3 times as before with PBST. Each well was incubated with 100µL of biotinylated-anti-streptavidin (Vector Laboratories Inc.) diluted 1:2000 in PBST. After a further three washes in PBST, each well was incubated with 100µL of a streptavidin-IR800 dye conjugate, diluted 1:20,000 in PBST+0.01% SDS (Li-Cor BioSciences UK) for 30 minutes, washed 3 times in PBST. The incubation cassette was dismantled and slides rinsed briefly in distilled water and dried by centrifugation at 600g for 10 seconds using a Labnet Slide Spinner (Sigma-Aldrich, UK). Fluorescent data from each microarray was captured using a Li-Cor Odyssey SA near-infra-red scanner, set to 20µm resolution and a sensitivity of 10.5 for the 800nm channel, 7 for the 680 channel. Microarray Images were analysed using Axon Genepix Pro software, version 6.8 to determine feature (spot) intensity and morphology and local background for each antigen feature. Further analysis was performed using Microsoft Excel and Graphpad Prism v8.

#### **RNA isolation, TCR library preparation and sequencing**

Briefly, cDNA synthesis was performed using SMARTScribe reverse transcriptase (Clontech, Takara) using primers for the TCR $\alpha$  and TCR $\beta$  constant region. A unique molecular identifier (UMI), and a sample barcode of 6 nucleotides, were introduced via template-switching. cDNA synthesis was carried out for 60 minutes at 42°C. cDNA was treated with Uracil DNA-Glycosylase (UDG, from New England Biolabs) and incubated for 30 minutes at 37°C. Samples were subsequently purified with the QIAquick PCR purification kit (Qiagen) and eluted in 50 µl deionized water. Purified cDNA was amplified with 2 consecutive PCRs, respectively 18 and 12 cycles, with purification after each PCR using MagSi-NGSprep Plus (MagnaMedics). Illumina compatible adapters and sample-specific barcodes were added during the second PCR. Quality and concentration of the libraries were measured with TapeStation D1000 (Agilent) and Qubit (ThermoFisher).

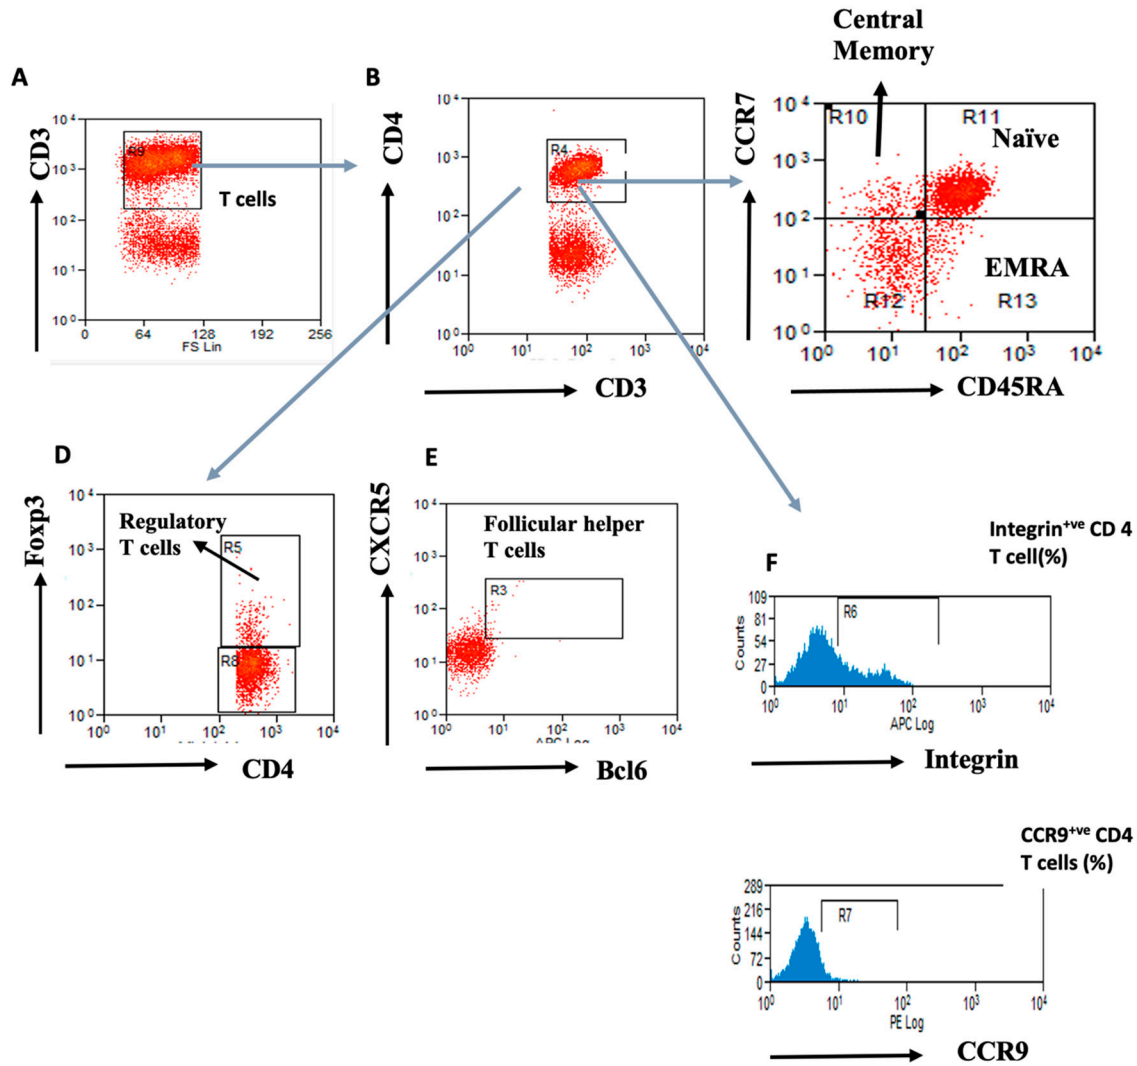

**Supplementary Figure S1. Gating strategy for CD4 T cell subsets.** Gating strategy for CD4 T cell subsets. (A) CD3<sup>+</sup>ve T cells (B) CD4<sup>+</sup>ve CD3<sup>+</sup>ve T cells (C) Naïve, central memory, effector memory, effector memory CD4 T cells have been identified on the basis of CCR7 and CD45RA expression (D) CD4<sup>+</sup>ve CD3<sup>+</sup>ve T cells Foxp3<sup>+</sup>ve regulatory T cells (E) CXCR5<sup>+</sup>ve bcl6<sup>+</sup>ve CD3<sup>+</sup>ve CD4<sup>+</sup>ve follicular helper T cells. (F) expression of CCR9 and Integrin on CD4 T cells.

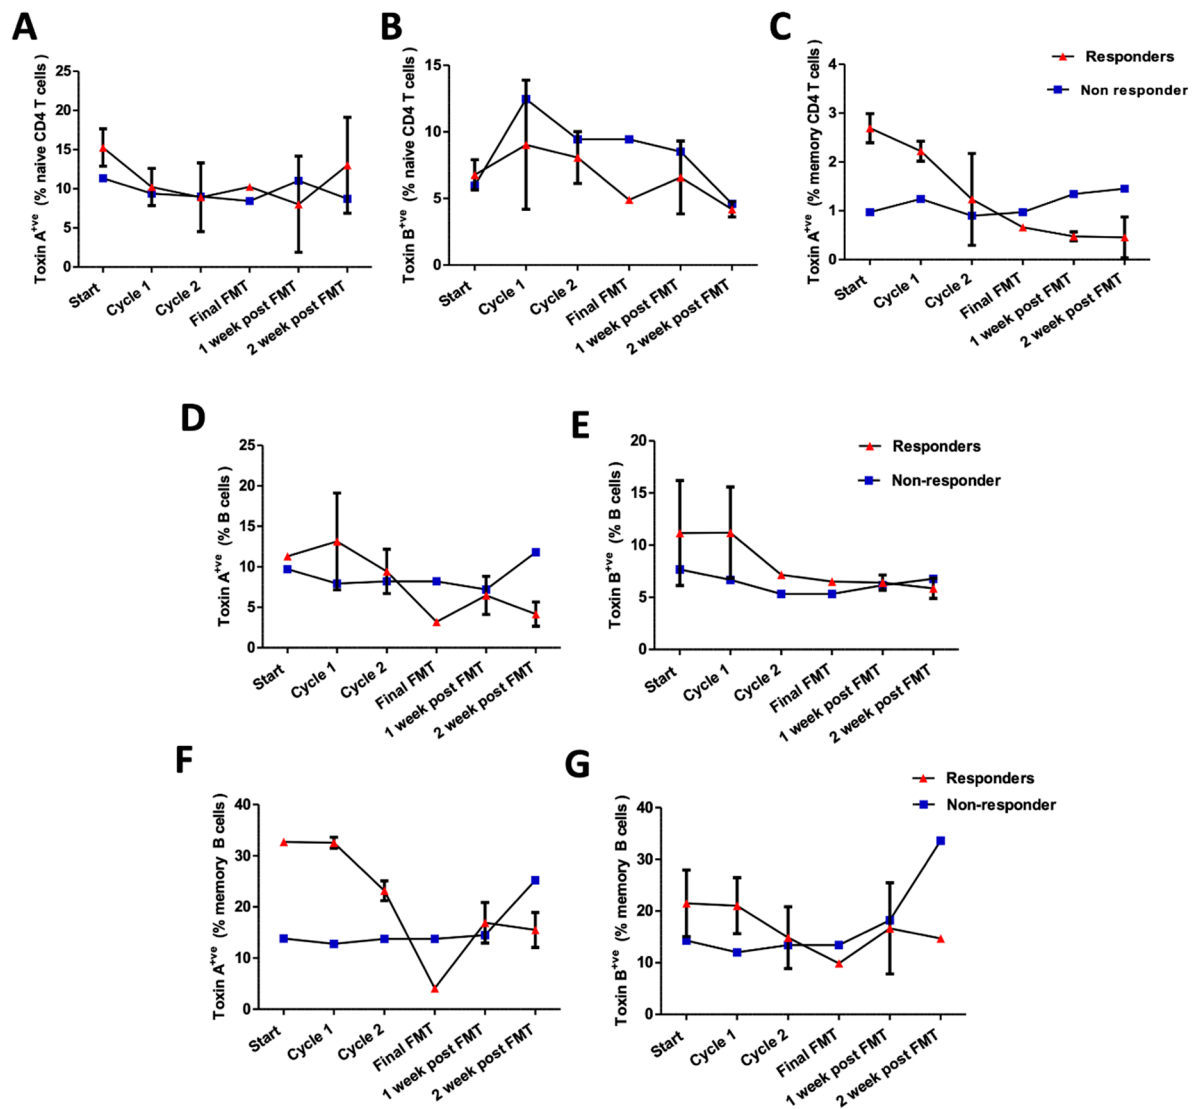

**Supplementary Figure S2. Toxin expressing T and B cells in patients with severe or fulminant *Clostridioides difficile* infection in relation to sequential FMT.** Percentage of peripheral (A) Toxin A<sup>+</sup>ve naïve CD4 T cells (B) Toxin B<sup>+</sup>ve naïve CD4 T cells (C) Toxin A<sup>+</sup>ve memory CD4 T cells (D) Toxin A<sup>+</sup>ve B cells (E) Toxin B<sup>+</sup>ve B cells (F) Toxin A<sup>+</sup>ve memory B cells (G) Toxin B<sup>+</sup>ve memory B cells in responders and one non-responder patient at the screening, post FMT cycle 1, post FMT Cycle 2, post final FMT cycle, 1 week and 2 weeks after FMT. The data are mean  $\pm$  S.D for the 2 responders.

A

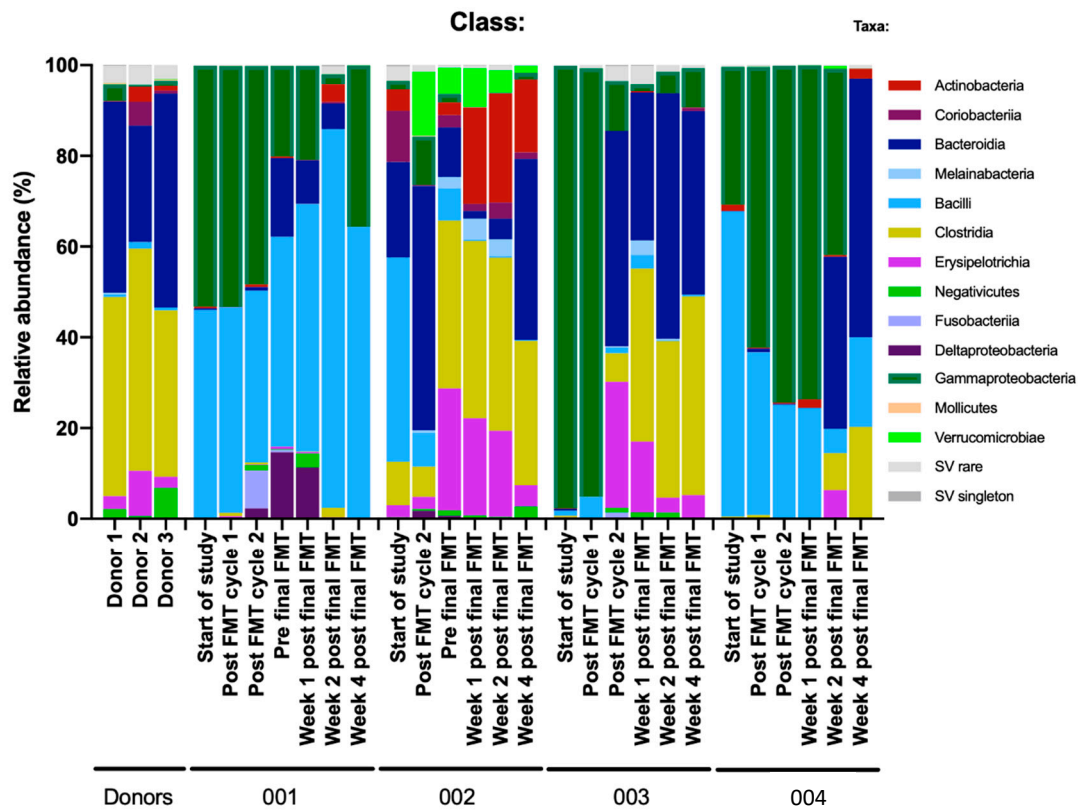

B

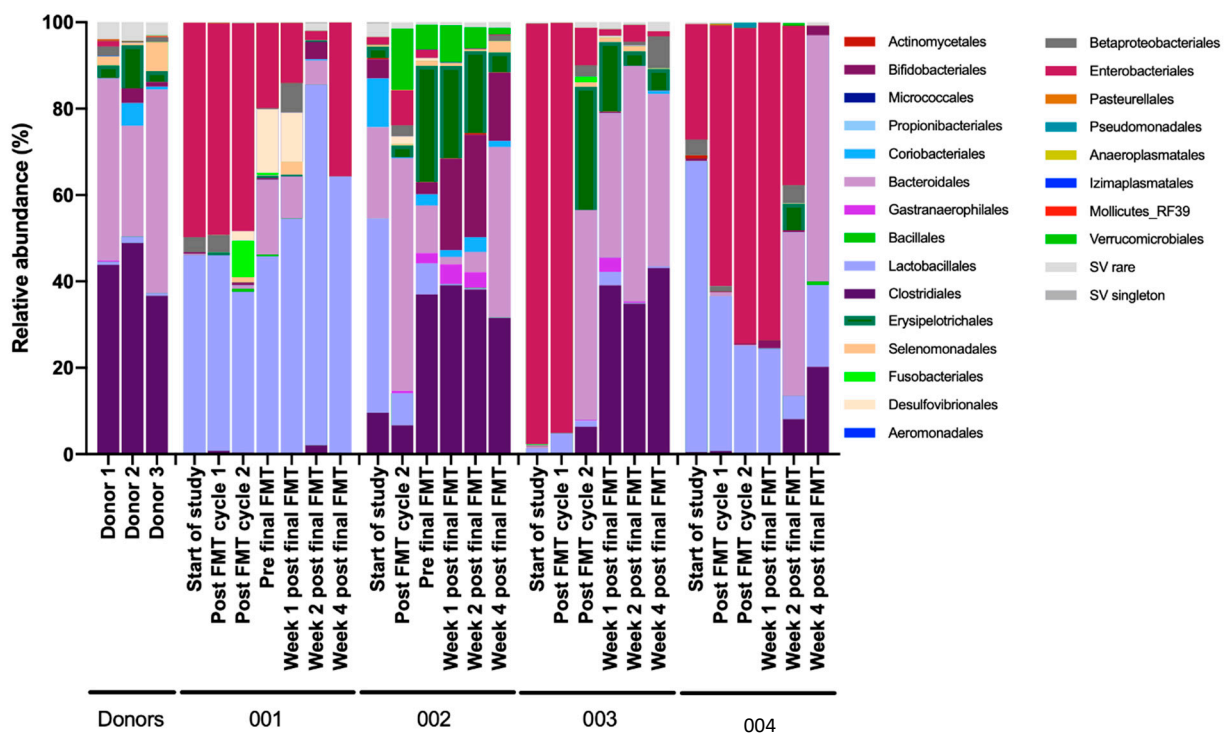



C

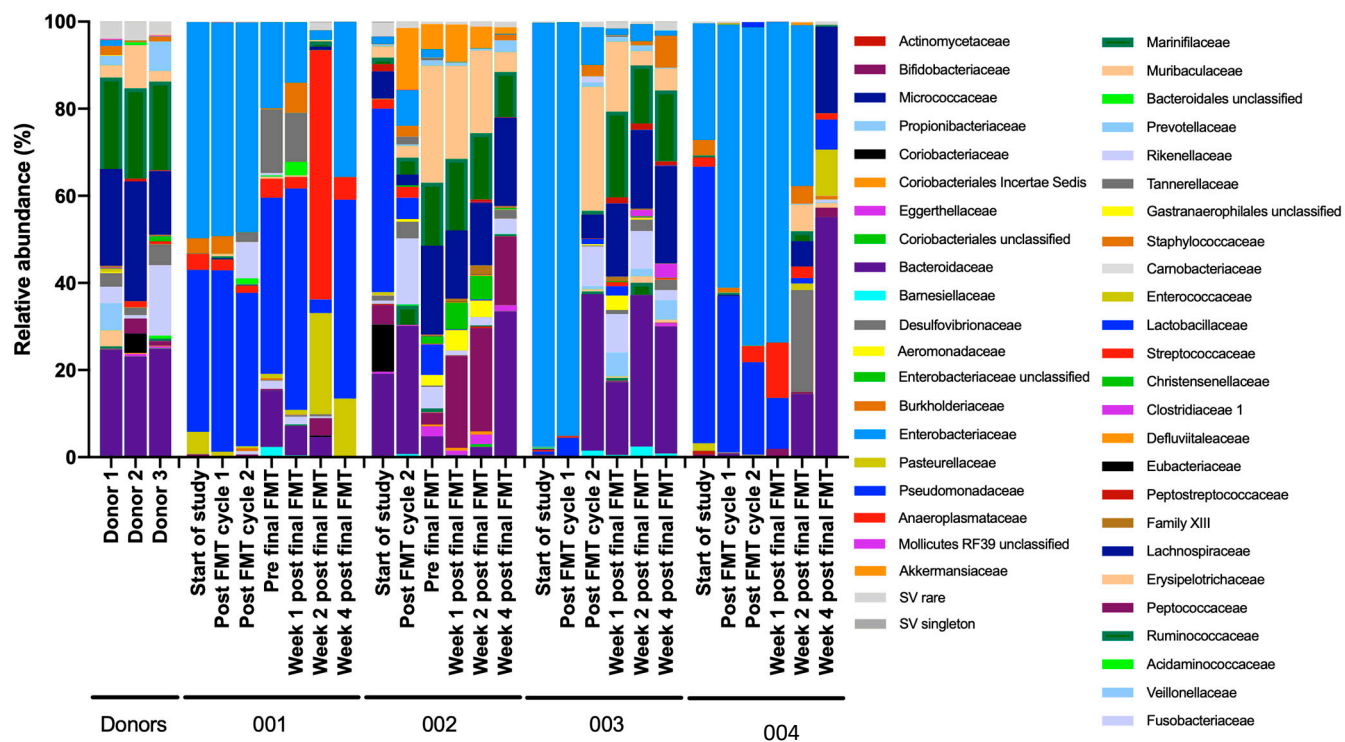

D

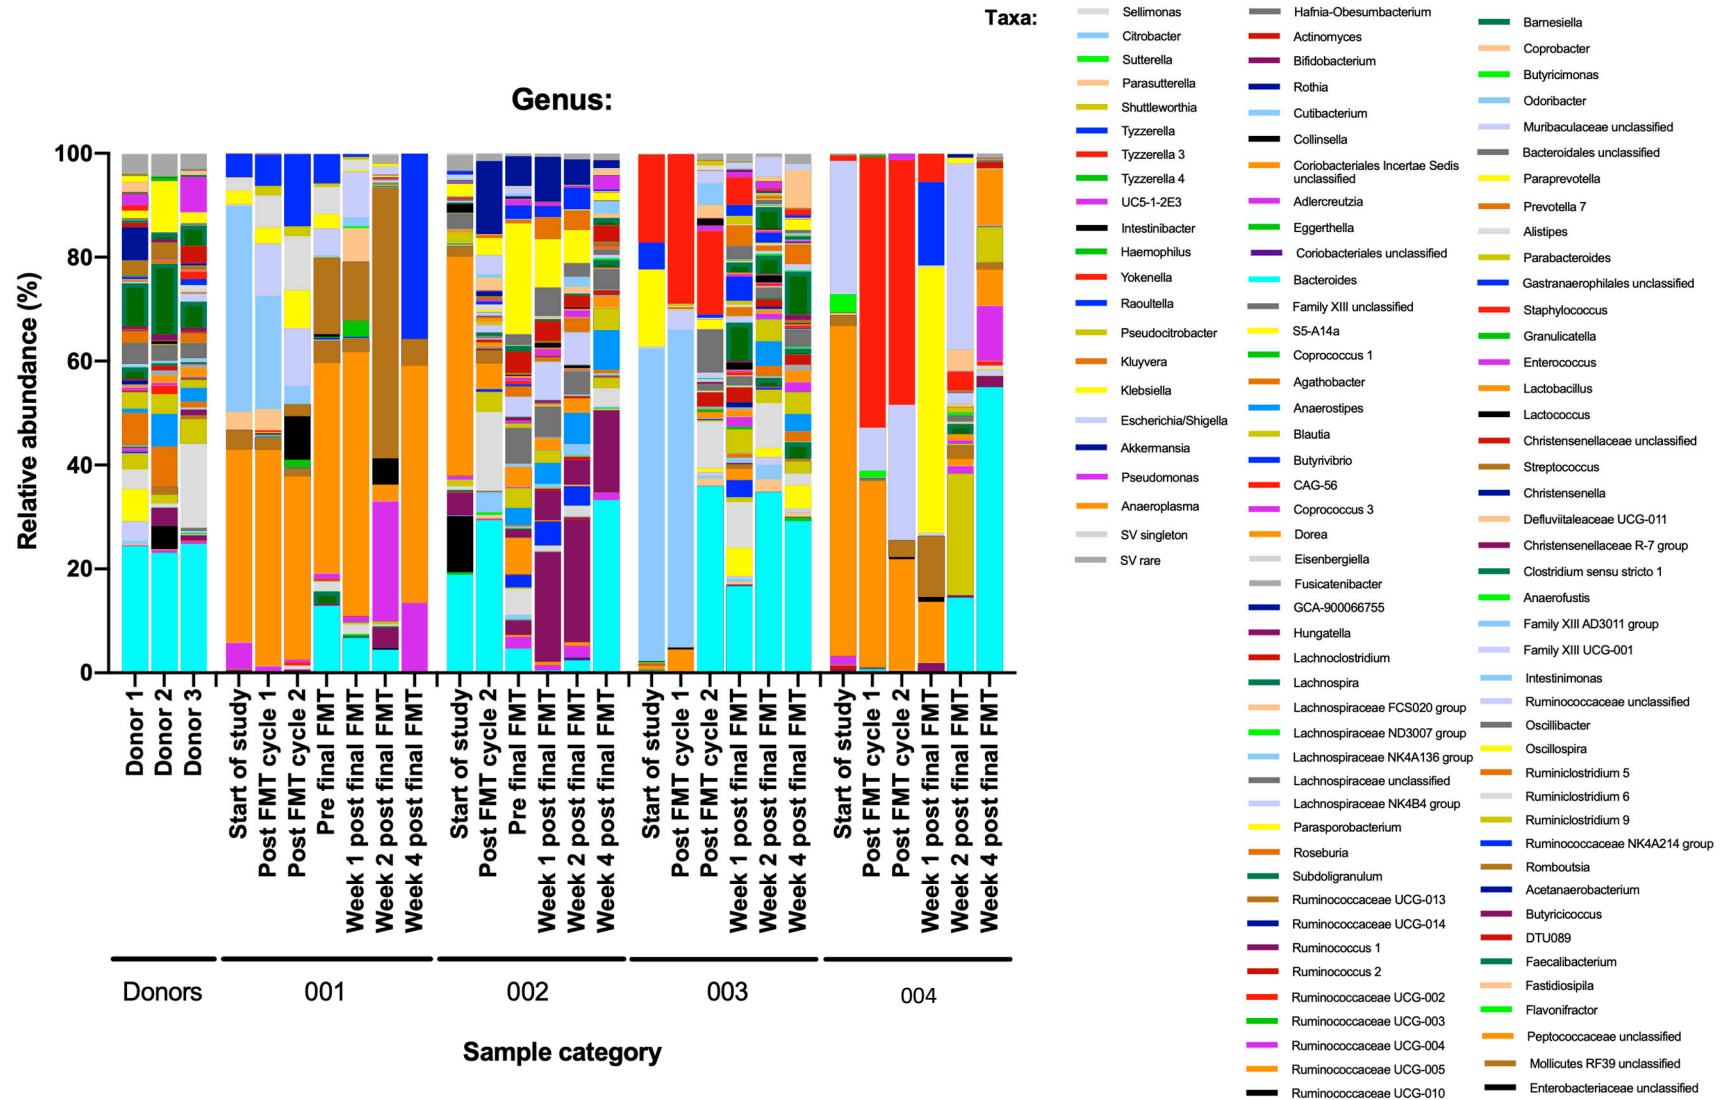

**Supplementary Figure S3. Fecal metataxonomic changes in relation to sequential FMT in patients with severe or fulminant *Clostridioides difficile* infection.** 16S rRNA gene sequencing of DNA extracted from stool samples, presented as relative abundance plots. Participant samples presented as: three stool donors; patient 1 (001), earliest to latest timepoint; patient 2 (002), earliest to latest timepoint; patient 3 (003), earliest to latest timepoint, and; patient 4 (004), earliest to latest timepoint. **(A) Class:** Healthy donor stool microbiomes were dominated by *Bacteroidia* and *Clostridia*, and severe CDI patients successfully treated by serial FMTs consistently demonstrated an increase in the relative abundance of these classes in their stool microbiome over the course of treatment. In contrast, treatment non-responder (patient 1) did not demonstrate this progression Figure S2 and retained a stool microbiome dominated by *Bacilli* and *Gammaproteobacteria*, similar to baseline assessment. **(B) Order:** Baseline stool samples from all four patients demonstrated particularly high relative abundance of Lactobacillales and Enterobacteriales, together with the smaller but consistent presence of *Betaproteobacteriales*. Over the course of therapy in all three responders, the relative abundance of all of these orders decreased to much more modest levels, with *Bacteroidales* and *Clostridiales* replacing them to become the dominant orders within the stool microbiome; this is comparable to the microbiome composition present in all three stool donors. Conversely, no consistent change in stool microbiome composition relative to baseline was observed over the course of FMT in the non-responder (patient 1). **(C) Family:** Over the course of treatment for the non-responder (patient 1), minimal changes were seen in stool microbiome composition at family level relative to the baseline sample, with *Lactobacillaceae* and *Enterobacteriaceae* remaining the dominant families, and *Streptococcaceae* present at a smaller but consistent relative abundance. In contrast, marked changes in stool bacterial family composition were seen in the three responders, transitioning in particular towards high relative abundances of *Bacteroidaceae*, *Ruminococcaceae* and *Lachnospiraceae*. The post-FMT stool bacterial family composition in responders at the end of analysis was similar to that observed in the three healthy donors. **(D) Genus:** Baseline samples from these patients were characterised by prominent relative abundances of genera including *Lactobacillus* and *Citrobacter*. Over the course of therapy in the three responders, there was restoration of genera including *Bacteroides*, *Faecalibacterium* and *Bifidobacterium*, again resulting in stool microbiome profiles more comparable to healthy stool donors. In contrast, only much more modest increases were seen in these particular genera over the course of therapy in the non-responder

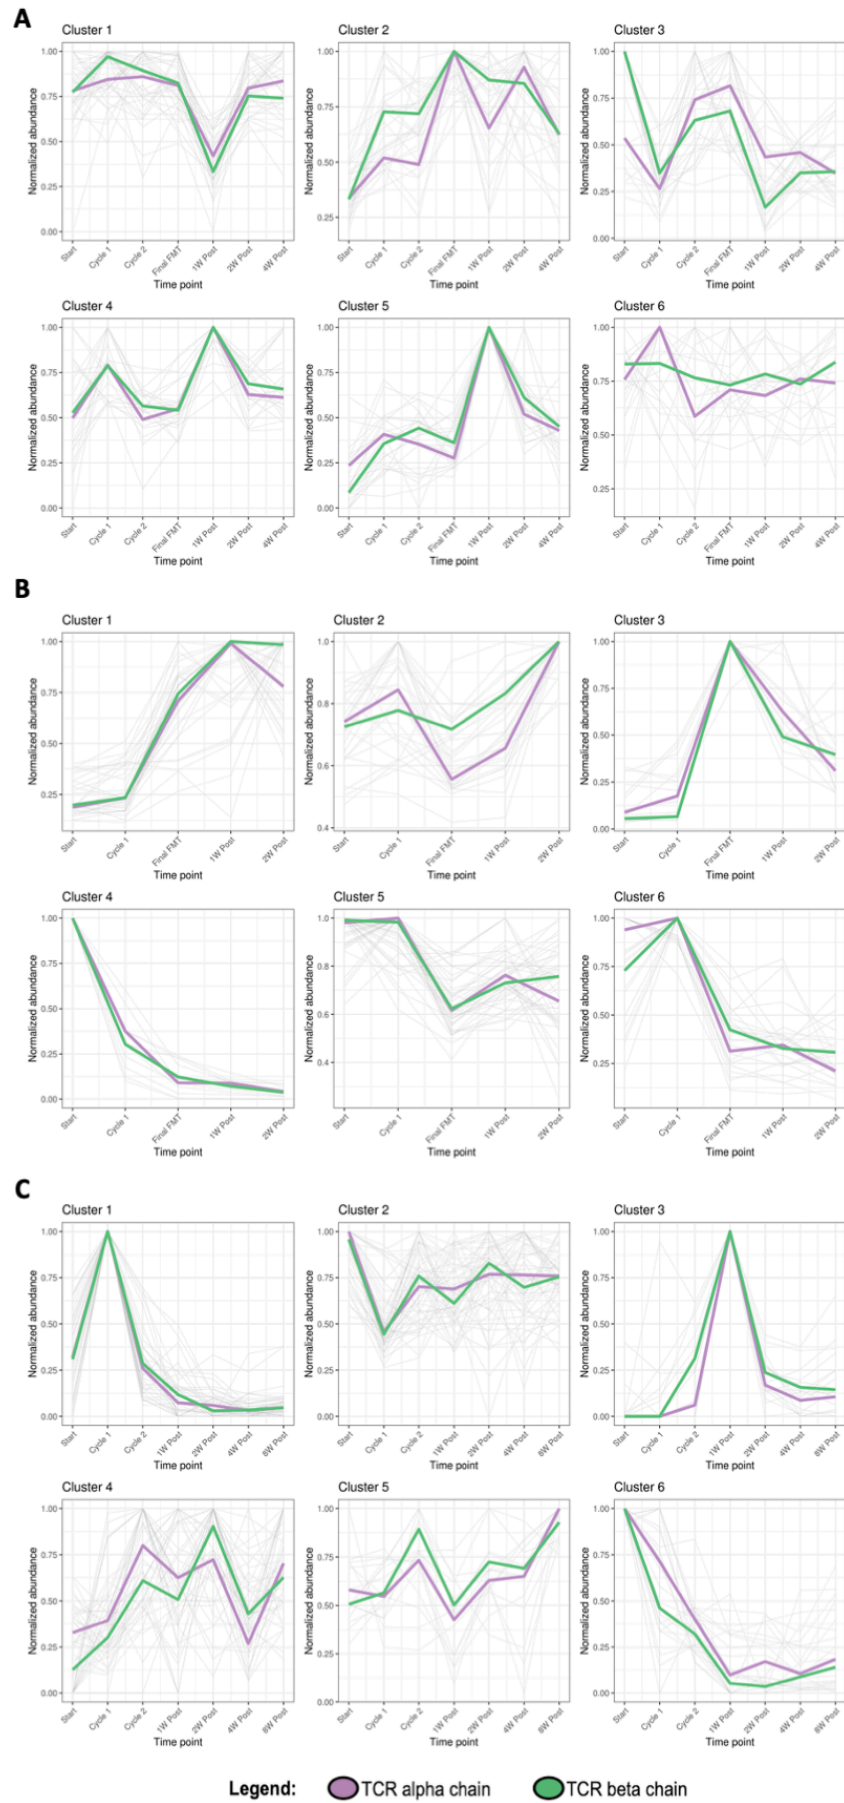

**Supplementary Figure S4. Temporal clustering of most abundant TCRs for FMT responders and non-responder.** Mfuzz based TCR temporal clustering. The most abundant 50 TCR clonotypes for each patient and time point were considered, (A) Patient 1 (P1), FMT failure (F)/non-responder. The same analysis is presented for (B) Patient 2 (P2), FMT success (S)/responder and (C) Patient 3 (P3), FMT success (S)/responder.

A

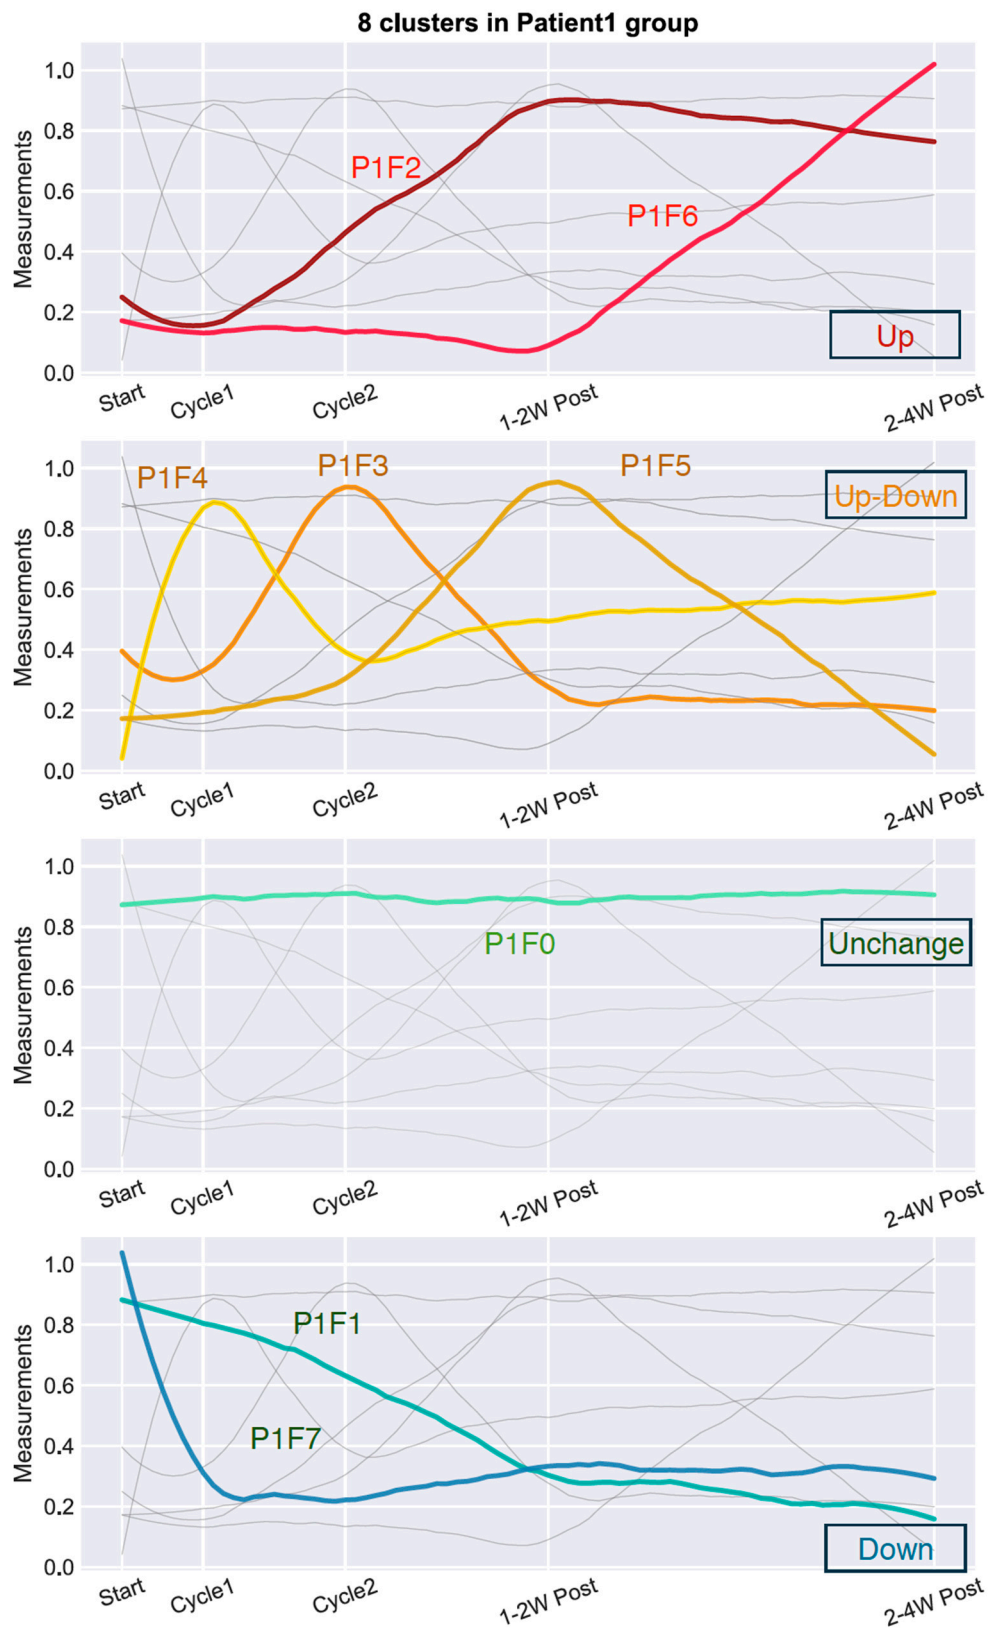

**B**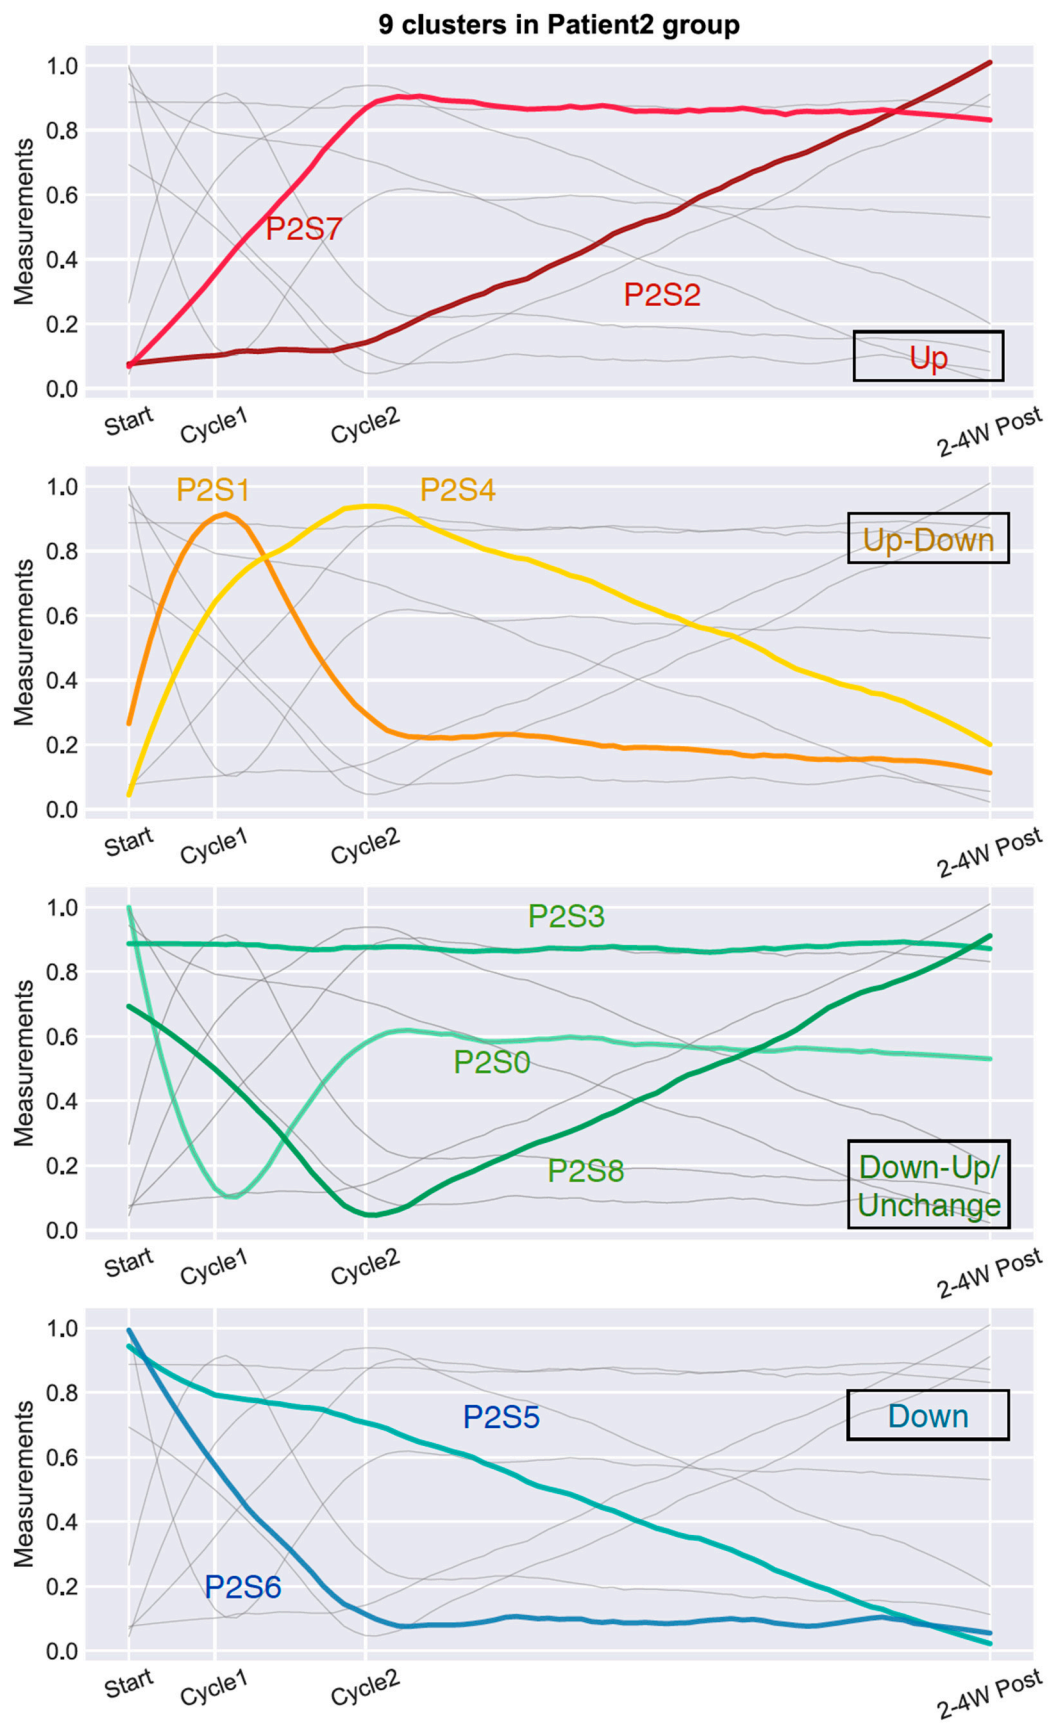



C

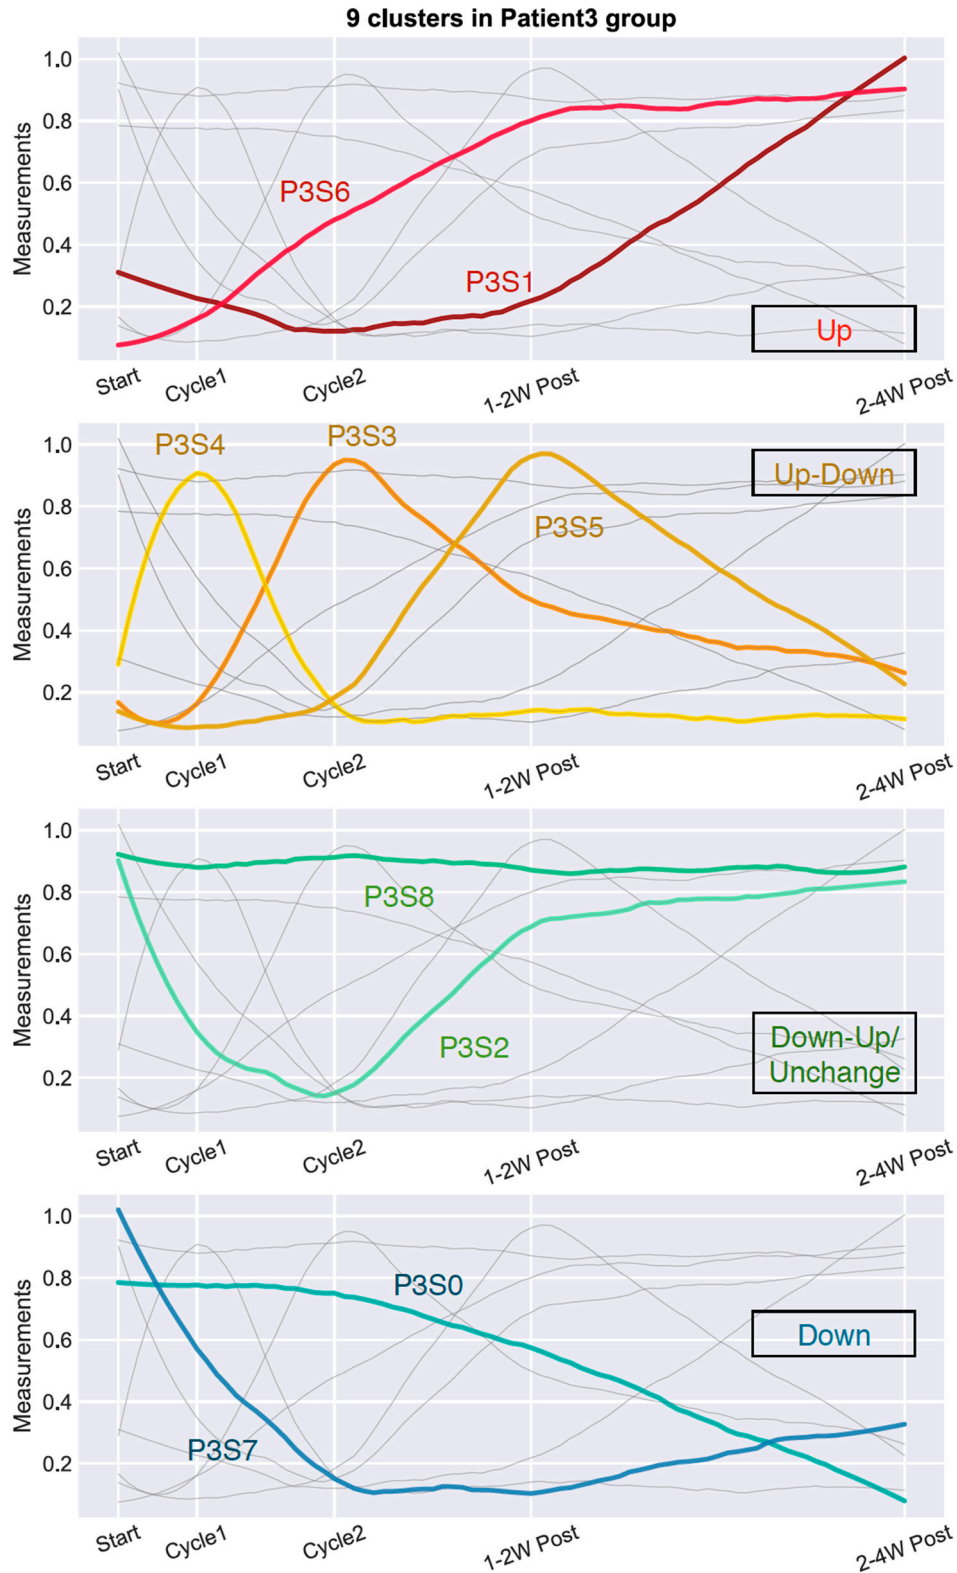

**Supplementary Figure S5. K-means integrative clustering of all measures including TCR alpha and beta clonotypes for FMT responders and non-responder.** Patient 1 (P1), FMT failure (F)/non-responder. (B) Patient 2 (P2), FMT success (S)/responder with each cluster indexed (C) Patient 3 (P3), FMT success (S)/responder with each cluster indexed. Clusters are based on the temporal behaviour of features over 5 time points. Clusters are re-grouped into four categories: increased after FMT (Up, red), increased after FMT but recovered (Up-Down, yellow), decreased after FMT but recovered (Down-Up) or Unchanged, green, decreased after FMT (Down, blue).

and decreased after FMT (Down, blue). Features within each indexed cluster for patients 1-3 are presented in Tables S5a-c, respectively.

**Supplementary Table S1. Dictionary of longitudinal features assessed in multiomics study (n=681)**

[Uploaded separately as Excel file due to size]



**Supplementary Table S2. Convergent features identified for FMT responders and non-responder**

| Feature                                                                                              | Feature Type                    | Start higher in | Fold Change log2 (succ/fail) pre-FMT | p-value (pre-FMT) | Fold Change log2 (succ/fail) post-FMT | p-value (post-FMT) |
|------------------------------------------------------------------------------------------------------|---------------------------------|-----------------|--------------------------------------|-------------------|---------------------------------------|--------------------|
| A002 IgG                                                                                             | Antigen-specific antibody panel | Success         | 2.168447383                          | 0.021598466       | 0.076664339                           | 0.912891473        |
| CD4 EMRA(%)                                                                                          | Flow Cytometry                  | Success         | 1.761077742                          | 0.016785885       | -0.120622559                          | 0.708534909        |
| miR-23a-3p                                                                                           | Serum MicroRNA                  | Success         | 1.201615131                          | 0.040607084       | 0.437550391                           | 0.579171863        |
| CD4:CD8 T cell ratio                                                                                 | Flow Cytometry                  | Success         | 1.197220744                          | 0.004186219       | 1.221598649                           | 0.068527041        |
| Taurodeoxycholic Acid-3-Sulfate                                                                      | Stool Bile Acids                | Success         | 1.072140319                          | 0.027285868       | -0.354160177                          | 0.699011958        |
| Glycodeoxycholic acid                                                                                | Stool Bile Acids                | Success         | 0.952510319                          | 0.041095589       | 0.492763241                           | 0.373079466        |
| CD28 expression levels on CD4 T cells (MFI)                                                          | Flow Cytometry                  | Success         | 0.886320797                          | 0.040484759       | 0.921093359                           | 0.05346842         |
| IL4 expression levels in stimulated CD4 T cells (MFI)                                                | Flow Cytometry                  | Success         | 0.586016717                          | 0.031999166       | 1.796466606                           | 0.196646558        |
| IgGII1H5N4F1S1; IgG2&3 glycopeptide with digalactosylated and monosialylated glycan with core fucose | IgG Glycoprofiling              | Success         | 0.437264647                          | 0.017212106       | 0.251641259                           | 0.459770001        |
| IL4+ve stimulated CD4 T cells (%)                                                                    | Flow Cytometry                  | Success         | 0.350398491                          | 0.020802347       | 0.366496604                           | 0.097774347        |
| Senescent NKG2D expression levels on CD4 T cells (MFI)                                               | Flow Cytometry                  | Success         | 0.257360075                          | 0.003461509       | 0.161912393                           | 0.070534502        |
| Senescent NKG2D expression levels on CD4 T cells (MFI)                                               | Flow Cytometry                  | Success         | 0.208923649                          | 0.008213432       | 0.132820495                           | 0.137849534        |
| Digalactosylated glycans                                                                             | Serum glycan traits             | Success         | 0.139048518                          | 0.015584596       | 0.15869462                            | 0.130148886        |
| TWEAK/TNFSF12                                                                                        | Inflammation panel              | Failure         | -0.20312782                          | 0.005215789       | -0.112393335                          | 0.196678529        |
| IgGII1H3N4; IgG2&3 glycopeptide with agalactosylated glycan without core fucose                      | IgG Glycoprofiling              | Failure         | -0.36672315                          | 0.041648577       | -0.270400717                          | 0.072381241        |
| Chitinase 3-like 1                                                                                   | Inflammation panel              | Failure         | -0.369364293                         | 0.025410356       | -0.168913433                          | 0.623049192        |
| IgGII1H4N4; IgG2&3 glycopeptide with monogalactosylated glycan without core fucose                   | IgG Glycoprofiling              | Failure         | -0.377672881                         | 0.04057148        | -0.156220857                          | 0.467559648        |
| T cells (%)                                                                                          | Flow Cytometry                  | Failure         | -0.389587322                         | 0.000805873       | -0.035851059                          | 0.812428456        |
| CD57 expression levels on CD4 T cells (MFI)                                                          | Flow Cytometry                  | Failure         | -0.431826795                         | 0.038188962       | 0.658496274                           | 0.093403683        |
| Cholic Acid-3-Sulfate                                                                                | Stool Bile Acids                | Failure         | -0.531041071                         | 0.005367387       | -0.205555769                          | 0.658217617        |
| VP1 Tox B IgA                                                                                        | Antigen-specific antibody panel | Failure         | -1.176152397                         | 0.028922776       | -0.524567556                          | 0.434758869        |
| VP1 ToxA IgG                                                                                         | Antigen-specific antibody panel | Failure         | -1.243666984                         | 0.025030736       | -0.251258925                          | 0.845753324        |
| 8(14),(5-beta)-Cholenic Acid-3-alpha, 12-alpha-diol                                                  | Stool Bile Acids                | Failure         | -1.32053665                          | 0.015044042       | -0.119199539                          | 0.843419393        |
| Raoultella                                                                                           | Genus                           | Failure         | -1.531677864                         | 0.031308584       | -0.672727411                          | 0.773643733        |
| 3-alpha-Hydroxy-7,12-DiketoCholanic Acid                                                             | Stool Bile Acids                | Failure         | -1.742191231                         | 0.032820762       | -0.926287754                          | 0.396171749        |
| <i>Enterococcaceae</i>                                                                               | Family                          | Failure         | -1.74757102                          | 0.02667642        | -1.973860785                          | 0.097431927        |
| <i>Enterococcus</i>                                                                                  | Genus                           | Failure         | -1.74757102                          | 0.02667642        | -1.973860785                          | 0.097431927        |
| <i>Enterobacteriaceae unclassified</i>                                                               | Genus                           | Failure         | -2.227394233                         | 0.000830761       | -2.154577971                          | 0.260908653        |
| <i>Pseudocitrobacter</i>                                                                             | Genus                           | Failure         | -2.238925946                         | 0.016836699       | -2.110493797                          | 0.270525836        |

**Supplementary Table S3. Divergent features identified for FMT responders and non-responder**

| Feature                                                                                                         | Feature Type        | Fold Change<br>log2 (succ/fail)<br>pre-FMT | p-value (pre-<br>FMT) | Fold Change<br>log2 (succ/fail)<br>post-FMT | p-value (post-<br>FMT) | Finish higher in |
|-----------------------------------------------------------------------------------------------------------------|---------------------|--------------------------------------------|-----------------------|---------------------------------------------|------------------------|------------------|
| Bregs (%)                                                                                                       | Flow Cytometry      | 1.68975869                                 | 0.06469277            | 3.12772671                                  | 0.00185911             | Success          |
| IL4 expression levels in stimulated CD4 T cells (MFI)                                                           | Flow Cytometry      | 0.31557843                                 | 0.44291517            | 1.27759122                                  | 0.00950044             | Success          |
| Acetate (calc. conc)                                                                                            | Stool SCFA          | -0.1673595                                 | 0.33176535            | 0.99613672                                  | 0.00411013             | Success          |
| Lithocholic acid                                                                                                | Stool Bile Acids    | 0.05104188                                 | 0.91379976            | 0.99174456                                  | 0.04336816             | Success          |
| CD28 expression levels on CD8 T cells (MFI)                                                                     | Flow Cytometry      | 0.18736624                                 | 0.35575933            | 0.5557157                                   | 0.04837418             | Success          |
| Acetate (ug/g)                                                                                                  | Stool SCFA          | -0.0865381                                 | 0.33421227            | 0.47227339                                  | 0.0037415              | Success          |
| IgGIIH4N4F1; IgG2&3 glycopeptide with monogalactosylated glycan with core fucose                                | IgG Glycoprofiling  | 0.29200766                                 | 0.10481597            | 0.45427218                                  | 0.0289065              | Success          |
| Low-branching glycans                                                                                           | Serum glycan traits | 0.09290351                                 | 0.17146535            | 0.1389985                                   | 0.03391767             | Success          |
| IgGIIH4N4S1; IgG2&3 glycopeptide with monogalactosylated and monosialylated glycan without core fucose          | IgG Glycoprofiling  | -0.1137404                                 | 0.21350884            | -0.0961381                                  | 0.04114768             | Failure          |
| Total memory CD8 T cells (%)                                                                                    | Flow Cytometry      | -0.1381691                                 | 0.06566426            | -0.2388483                                  | 0.00385259             | Failure          |
| IgGIIH4N5F1; IgG1 glycopeptide with bisected monogalactosylated glycan with core fucose                         | IgG Glycoprofiling  | 0.02136881                                 | 0.86872911            | -0.2453512                                  | 0.02330967             | Failure          |
| IgGIIH4N5S1; IgG2&3 glycopeptide with bisected monogalactosylated and monosialylated glycan without core fucose | IgG Glycoprofiling  | -0.2297707                                 | 0.25951037            | -0.2786098                                  | 0.01431667             | Failure          |
| IgGIIH4N5F1S1; IgG1 glycopeptide with bisected monogalactosylated and monosialylated glycan with core fucose    | IgG Glycoprofiling  | -0.0079357                                 | 0.92809602            | -0.3236003                                  | 0.0322431              | Failure          |
| Senescent CD57+ve CD8 T cells (%)                                                                               | Flow Cytometry      | -0.3562092                                 | 0.1470277             | -0.32671                                    | 0.01498308             | Failure          |
| Trisialylated glycans                                                                                           | Serum glycan traits | -0.2363198                                 | 0.19608774            | -0.3654888                                  | 0.04019557             | Failure          |
| High-branching glycans                                                                                          | Serum glycan traits | -0.2344961                                 | 0.1397511             | -0.3942921                                  | 0.01229867             | Failure          |
| Senescent CD57+ve CD4 T cells (%)                                                                               | Flow Cytometry      | -0.0870038                                 | 0.72407094            | -0.567451                                   | 0.0197068              | Failure          |
| sTNF-R2                                                                                                         | Inflammation panel  | -0.6969736                                 | 0.06935009            | -0.6998909                                  | 0.03878925             | Failure          |
| Senescent CD28-ve CD4 T cells (%)                                                                               | Flow Cytometry      | -0.0914494                                 | 0.77865461            | -0.7292478                                  | 0.01552293             | Failure          |
| Tetragalactosylated glycans                                                                                     | Serum glycan traits | -0.2336985                                 | 0.1027724             | -0.7322653                                  | 0.00095655             | Failure          |
| Tetrasialylated glycans                                                                                         | Serum glycan traits | -0.1890873                                 | 0.22635387            | -0.7346522                                  | 0.00200455             | Failure          |
| Senescent CD28-veCD57+vet CD4 T cells (%)                                                                       | Flow Cytometry      | -0.2027912                                 | 0.53254705            | -0.7506846                                  | 0.01353224             | Failure          |
| Antennary fucosylation                                                                                          | Serum glycan traits | -0.3708882                                 | 0.07418547            | -0.7876227                                  | 0.0057968              | Failure          |

**Supplementary Table S4. K-means cluster analysis without TCR repertoire data showing features within each indexed cluster for A. FMT Responders; B. FMT non-responder**

[Uploaded separately as Excel file due to size]

**Supplementary Table S5. K-means cluster analysis with TCR repertoire data showing features within each indexed cluster for A. Patient 1; B. Patient 2; and C. Patient 3.**

[Uploaded separately as Excel file due to size]

**Supplementary Table S6. Immunosenescent T cell parameter correlations with omics features for FMT responders and non-responder (Absolute value of Spearman Correlation Coefficient >0.9; p<0.05)**

|                              | FMT Responders:<br>senescent T cell correlations with omics                                                                                                                                                                                                                                                                                                                                                                                                                                             |                                                                                                                                                                                                                                                                                                                                                                                                                                                                                                                                                      | FMT Non-responder:<br>senescent T cell correlations with omics                                                                                                                                                                                                                                                                                                       |                        |
|------------------------------|---------------------------------------------------------------------------------------------------------------------------------------------------------------------------------------------------------------------------------------------------------------------------------------------------------------------------------------------------------------------------------------------------------------------------------------------------------------------------------------------------------|------------------------------------------------------------------------------------------------------------------------------------------------------------------------------------------------------------------------------------------------------------------------------------------------------------------------------------------------------------------------------------------------------------------------------------------------------------------------------------------------------------------------------------------------------|----------------------------------------------------------------------------------------------------------------------------------------------------------------------------------------------------------------------------------------------------------------------------------------------------------------------------------------------------------------------|------------------------|
|                              | Positive correlation                                                                                                                                                                                                                                                                                                                                                                                                                                                                                    | Negative correlation                                                                                                                                                                                                                                                                                                                                                                                                                                                                                                                                 | Positive correlation                                                                                                                                                                                                                                                                                                                                                 | Negative correlation   |
| Fecal SCFA                   | 2-hydroxybutyrate                                                                                                                                                                                                                                                                                                                                                                                                                                                                                       | Valerate<br>Isobutyrate<br>2-methylbutyrate<br>Isobutyrate<br>Isovalerate<br>Butyrate<br>Propionate                                                                                                                                                                                                                                                                                                                                                                                                                                                  | Butyrate                                                                                                                                                                                                                                                                                                                                                             | NA                     |
| Serum SCFA                   | NA                                                                                                                                                                                                                                                                                                                                                                                                                                                                                                      | Propionate<br>2-methylbutyrate                                                                                                                                                                                                                                                                                                                                                                                                                                                                                                                       | 2-hydroxybutyrate                                                                                                                                                                                                                                                                                                                                                    | Lactate                |
| Fecal BA                     | Glycoursodeoxycholic acid-3-Sulfate<br>Tauroursodeoxycholic acid<br>Glycoursodeoxycholic acid<br>Taurodeoxycholic acid-3-sulfate<br>Ursodeoxycholic acid-3-sulfate<br>Glycolithocholic acid-3-sulfate<br>Glycodeoxycholic acid-3-sulfate<br>Glycodeoxycholic acid<br>5-cholenic acid-3-beta-ol<br>3-alpha-hydroxy-7 ketolithocholic acid<br>Glycochenodeoxycholic acid<br>Tauroolithocholic acid-3-sulfate<br>Glycohyocholic acid<br>Taurochenodeoxycholic acid<br>Glycochenodeoxycholic acid-3-sulfate | Hyodeoxycholic acid<br>3-alpha-hydroxy-12 ketolithocholic acid<br>Deoxycholic acid<br>Ursodeoxycholic acid<br>Isodeoxycholic acid<br>5-beta-cholanic acid-3-beta, 12-alpha-diol<br>Lithocholic acid<br>3,6-diketocholanic acid/3,12-diketocholanic acid                                                                                                                                                                                                                                                                                              | Ursodeoxycholic acid<br>Isodeoxycholic acid<br>Hyodeoxycholic acid                                                                                                                                                                                                                                                                                                   | NA                     |
| Serum N-glycans              | Trisialylated<br>High-branching<br>Trigalactosylated<br>Tetrasialylated<br>Tetragalactosylated<br>Disialylated<br>Antennary Fucosylation                                                                                                                                                                                                                                                                                                                                                                | Oligomannose<br>Bisection (glycans with bisecting GlcNAc)<br>Neutral (not sialylated)<br>Agalactosylated glycans<br>Core fucosylation<br>Monogalactosylated<br>Low-branching                                                                                                                                                                                                                                                                                                                                                                         | NA                                                                                                                                                                                                                                                                                                                                                                   | NA                     |
| Serum IgG Fc N-glycopeptides | IgG4H4H5<br>IgG1H4N5F1<br>IgG2H4N5F1<br>IgG2H4N5F1S1<br>IgG1H4N5F1S1<br>IgG1H4N5F1<br>IgG4H4N4F1<br>IgG4H5N4F1S1<br>IgG2H4N5F1S1<br>IgG1H4N4F1<br>IgG4H4N4F1S1<br>IgG1H4N5F1                                                                                                                                                                                                                                                                                                                            | IgG1H3N4<br>IgG4H5N4S1<br>IgG1H4N4S1                                                                                                                                                                                                                                                                                                                                                                                                                                                                                                                 | IgG4H4N5F1<br>IgG2H3N4<br>IgG2H5N5F1<br>IgG2H3N4<br>IgG4H3N4<br>IgG1H3N5F1<br>IgG4H3N5F1                                                                                                                                                                                                                                                                             | IgG4H5H5<br>IgG4H5N4F1 |
| Fecal microbiota             | <i>Collinsella</i><br><i>Prevotella_7</i><br><i>Tyzzereella_4</i><br><i>Coriobacteriaceae</i><br><i>S5-A14a</i><br><i>Barnesiella</i><br><i>Ruminococcus_1</i><br><i>Bacilli</i><br><i>Lactobacillales</i><br><i>Mollicutes_RF_unclassified</i><br><i>Mollicutes_RF39_unclassified</i><br><i>Mollicutes RF39</i><br><i>Cutibacterium</i><br><i>Propionibacteriales</i><br><i>Lactobacillaceae</i><br><i>Lactobacillus</i><br><i>Sutterella</i><br><i>Citrobacter</i>                                    | <i>Ruminococcaceae_UCG-004</i><br><i>Christensenellaceae</i><br><i>Faecalibacterium</i><br><i>Coriobacteriales_Incertae_Sedis</i><br><i>Coriobacteriales_Incertae_Sedis_unclassified</i><br><i>Christensenellaceae_R-7_group</i><br><i>Ruminococcaceae</i><br><i>Coproccoccus_3</i><br><i>Parasporobacterium</i><br><i>Bifidobacteriaceae</i><br><i>Bifidobacteriales</i><br><i>Bifidobacterium</i><br><i>Family_XIII_AD3011_group</i><br><i>Family_XIII</i><br><i>Actinobacteria</i><br><i>Erysipelotrichaceae_UCG-003</i><br><i>Prevotellaceae</i> | <i>Pseudomonas</i> at the genus, family, and order level<br><i>Coproccoccus_1</i><br><i>Ruminococcaceae_014</i><br><i>Solibacterium</i><br><i>Mollicutes</i><br><i>Mollicutes RF39</i><br><i>Mollicutes_RF39_unclassified</i><br><i>Mollicutes RF_39_unclassified</i><br><i>Rikenellaceae</i><br><i>Tenericutes</i><br><i>Alistipes</i><br><i>Acidaminococcaceae</i> | NA                     |

|                               |                                                                                                                                                                                                                                                                                                                                                  |                                                                                                                                                                                                                                                                                                                                                                                                                                                                                                                                                                                                                                                                                  |                                                                                                                                                                                                                          |                                                     |
|-------------------------------|--------------------------------------------------------------------------------------------------------------------------------------------------------------------------------------------------------------------------------------------------------------------------------------------------------------------------------------------------|----------------------------------------------------------------------------------------------------------------------------------------------------------------------------------------------------------------------------------------------------------------------------------------------------------------------------------------------------------------------------------------------------------------------------------------------------------------------------------------------------------------------------------------------------------------------------------------------------------------------------------------------------------------------------------|--------------------------------------------------------------------------------------------------------------------------------------------------------------------------------------------------------------------------|-----------------------------------------------------|
|                               | <i>Coriobacteria</i><br><i>Escherichia/Shigella</i><br><i>Coriobacteriaceae</i><br><i>SV_singleton</i>                                                                                                                                                                                                                                           | <i>Paraprevotella</i><br><i>Defluvitaleaceae_UCG-011</i><br><i>Defluvitaleaceae</i><br><i>Christensenellaceae_unclassified</i><br><i>Ruminococcaceae_unclassified</i><br><i>Anaerofustis</i><br><i>Eubacteriaceae</i><br><i>Clostridiales</i><br><i>Clostridia</i><br><i>Lachnospiraceae_unclassified</i><br><i>Erysipelotrichaceae_unclassified</i><br><i>Eisenbergiella</i><br><i>Candidatus_Stoquefichus</i><br><i>Butyrificoccus</i><br><i>Lachnoclostridium</i><br><i>Ruminococcus_2</i><br><i>Tyzzerella_3</i><br><i>Prevotellaceae</i><br><i>Ruminiclostridium_6</i><br><i>Faecalitalea</i><br><i>Subdoligranulum</i><br><i>Lachnospiraceae</i><br><i>Ruminococcaceae</i> | <i>Phascolarctobacterium</i>                                                                                                                                                                                             |                                                     |
| Inflammation-related proteins | sTNF-R1<br>IL-29/IFN- $\lambda$ 1<br>sTNF-R2<br>Osteopontin<br>LIGHT/TNFSF14<br>IL-11<br>Pentraxin-3<br>IFN- $\gamma$<br>MMP-1<br>IL-28A/IFN- $\lambda$ 2<br>sIL-6Ra<br>TWEAK/TNFSF12<br>IL-2<br>IL-10<br>IL-12 (p40)<br>IL-26<br>IFN- $\alpha$ 2<br>IL-27<br>sCD30/TNFRSF8<br>IL-32<br>TSLP<br>IFN- $\beta$<br>IL-35<br>IL-19<br>sCD163<br>IL-8 | NA                                                                                                                                                                                                                                                                                                                                                                                                                                                                                                                                                                                                                                                                               | Osteocalcin                                                                                                                                                                                                              | MMP-1<br>Osteopontin<br>IL-26<br>Chitinase 3-like 1 |
| Serum Ig                      | EBV IgA                                                                                                                                                                                                                                                                                                                                          | IgM antibodies to SLPs of <i>C. difficile</i> ribotypes 001, 027<br>CMV IgM<br>Tetanus IgG<br>Toxin A IgG<br>Total IgM, IgA, IgG1, IgG2, IgG3, IgG4                                                                                                                                                                                                                                                                                                                                                                                                                                                                                                                              | Toxin B IgG<br>EBV IgA<br>IgG lysate 027<br>ribotype<br>IgG SLP 002<br>ribotype<br>EBV IgM<br>IgG SLP 002<br>ribotype<br>Toxin B IgA<br>IgM SLP 002<br>ribotype<br>IgA lysate 001<br>ribotype<br>IgG SLP 002<br>ribotype | Tetanus IgG<br>CMV IgG<br>IgM SLP 027<br>ribotype   |
| Serum microRNA                | NA                                                                                                                                                                                                                                                                                                                                               | miR-23a-3p<br>miR-451a<br>Let-7b                                                                                                                                                                                                                                                                                                                                                                                                                                                                                                                                                                                                                                                 | NA                                                                                                                                                                                                                       | NA                                                  |

Senescent T cell parameters [CD28<sup>-ve</sup> CD57<sup>+ve</sup> CD4 T cells (%), CD28<sup>-ve</sup> CD57<sup>+ve</sup> CD8 T cells (%), CD28<sup>-ve</sup> CD8 T cells (%), CD28<sup>-ve</sup> T cells (%), CD57<sup>+ve</sup> CD8 T cells (5), CD57<sup>+ve</sup> CD4 T cells (%), and CD28<sup>-ve</sup> CD4 T cells (%)] were correlated with omics features.

IgG4H4H5 = IgG4 glycopeptide with bisected monogalactosylated glycan without core fucose; IgG1H4N5F1 = IgG1 glycopeptide with bisected monogalactosylated glycan with core fucose; IgG2H4N5F1 = IgG2&3 glycopeptide with bisected monogalactosylated glycan with core fucose; IgG2H4N5F1S1 = IgG2&3 glycopeptide with bisected monogalactosylated and monosialylated glycan with core fucose; IgG1H4N5F1S1 = IgG1 glycopeptide with bisected monogalactosylated and monosialylated glycan with core fucose; IgG1H4N5F1 = IgG1 glycopeptide with bisected monogalactosylated glycan with core fucose; IgG4H4N4F1 = IgG4 glycopeptide with monogalactosylated glycan with core fucose; IgG4H5N4F1S1 = IgG4 glycopeptide with digalactosylated and monosialylated glycan with core fucose; IgG2H4N5F1S1 = IgG2&3 glycopeptide with bisected monogalactosylated and monosialylated glycan with core fucose; IgG1H4N4F1 = IgG1 glycopeptide with monogalactosylated glycan with core fucose; IgG1H3N4 = IgG1 glycopeptide with agalactosylated glycan without core fucose; IgG4H5N4S1 = IgG4 glycopeptide with digalactosylated and monosialylated glycan without core fucose; IgG1H4N4S1 = IgG1 glycopeptide with monogalactosylated and monosialylated glycan without core fucose; IgG4H4N5F1 = IgG4 glycopeptide with bisected monogalactosylated glycan with core fucose; IgG2H3N4 = IgG2&3 glycopeptide with agalactosylated glycan without core fucose; IgG2H5N5F1 = IgG2&3 glycopeptide with bisected digalactosylated glycan with core fucose; IgG2H3N4 = IgG2&3 glycopeptide with agalactosylated glycan without core fucose; IgG4H3N4 = IgG4 glycopeptide with agalactosylated glycan without core fucose; IgG1H3N5F1 = IgG1 glycopeptide with bisected agalactosylated glycan with core fucose; IgG4H5H5 = IgG4 glycopeptide with bisected digalactosylated glycan without core fucose; IgG4H5N4F1 = IgG4 glycopeptide with digalactosylated glycan with core fucose; IgG4H3N5F1 = IgG4 glycopeptide with bisected agalactosylated glycan with core fucose

**Supplementary Table S7. Other selected differentiating parameters and their omics correlations for FMT responders (A) and non-responder (B) (Absolute value of Spearman Correlation Coefficient >0.9; p<0.05)**

[Uploaded separately as Excel file due to size]

**REFERENCES**

- Moreau, N. M., Goupry, S. M., Antignac, J. P., Monteau, F. J., Le Bizec, B. J., Champ, M. M., et al. (2003). Simultaneous measurement of plasma concentrations and <sup>13</sup>C-enrichment of short-chain fatty acids, lactic acid and ketone bodies by gas chromatography coupled to mass spectrometry. *J. Chromatogr. B. Analyt. Technol. Biomed. Life Sci.* 784, 395–403. doi:10.1016/s1570-0232(02)00827-9.
- Mullish, B. H., Pechlivanis, A., Barker, G. F., Thursz, M. R., Marchesi, J. R., and McDonald, J. A. K. (2018). Functional microbiomics: Evaluation of gut microbiota-bile acid metabolism interactions in health and disease. *Methods* 149, 49–58. doi:10.1016/j.ymeth.2018.04.028.
- Wolfer, A. M., Jaketmp, Gscoreia89, and Turaga, N. (2020). phenomecentre-peakPantheR. *Zenodo*. doi:10.5281/ZENODO.3776779.
